# Supplementary material for: Thioridazine Enhances P62-Mediated Autophagy and Apoptosis Through Wnt/β-Catenin Signaling Pathway in Glioma Cells
Source: MDPI journal article supplement (doi:10.3390/ijms20030473), 2019-01-22
Supplement: s1 [file s1]

## Supplement Fig 1

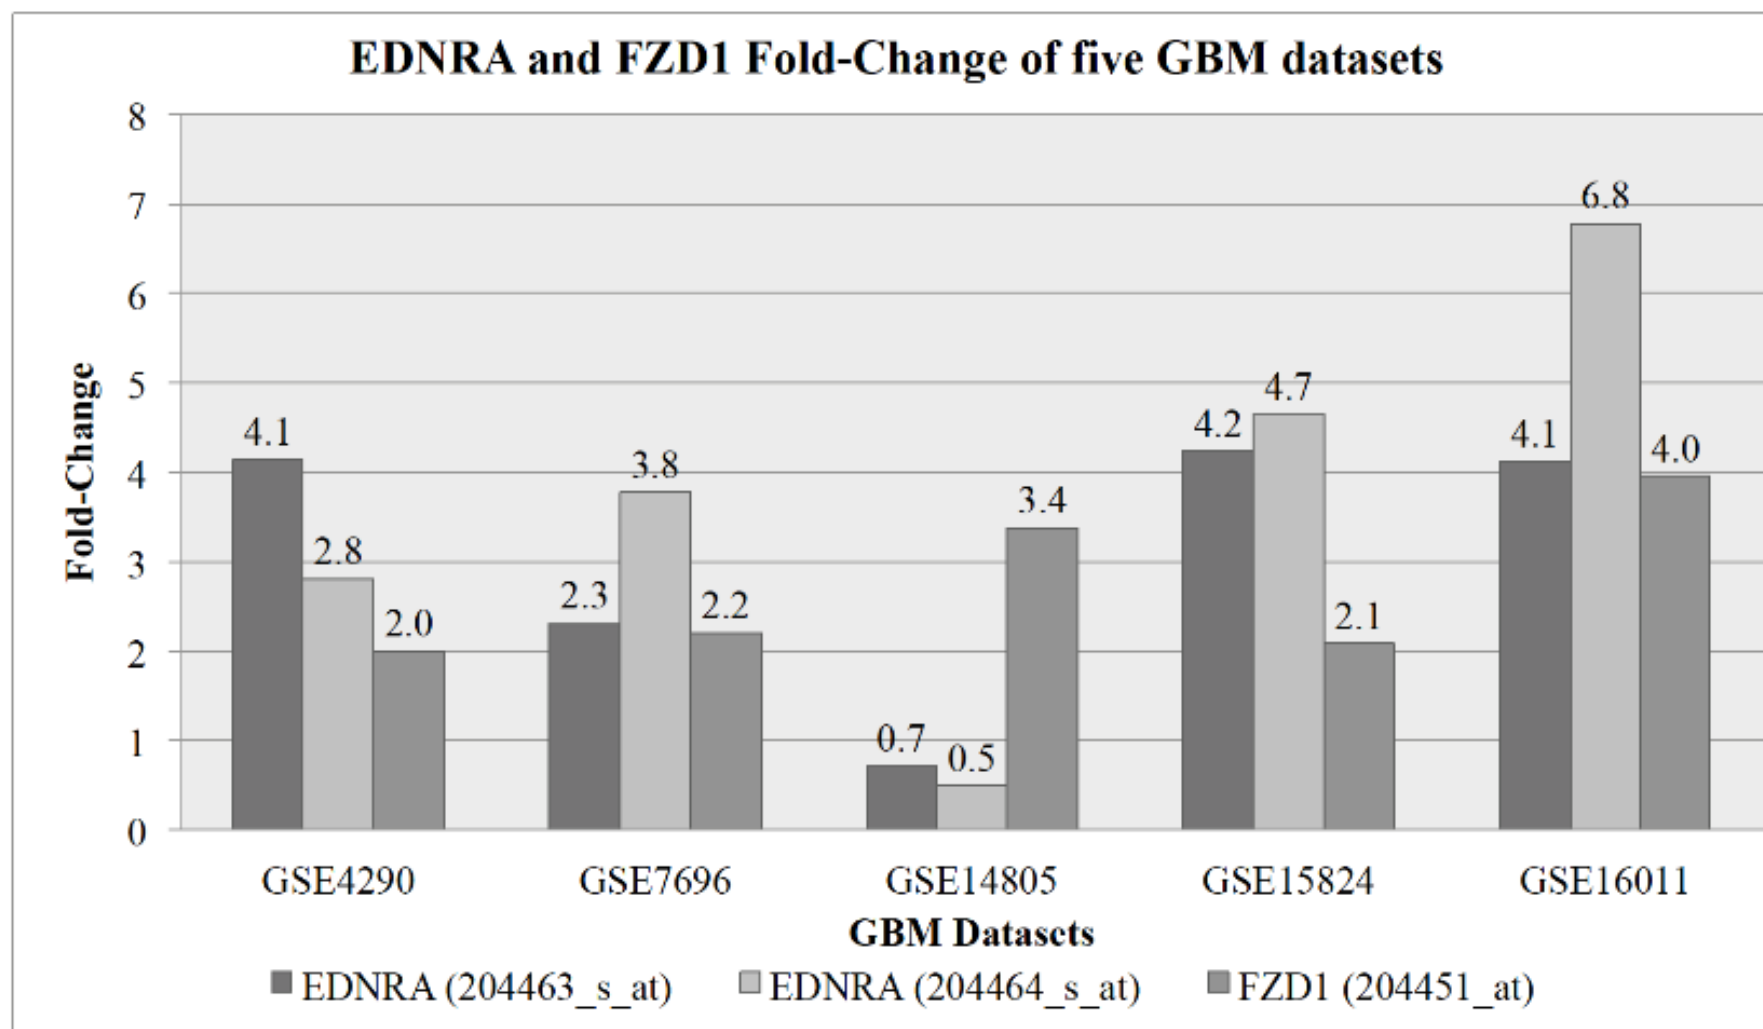

**Supplementary table 1. Up-regulated and down-regulated proteins in the microwestern assay.**

| Up-regulation Protein     | Sample           | Fold change |
|---------------------------|------------------|-------------|
| p-AMPK $\alpha$ (Thr 172) | THD (0 $\mu$ M)  | 1.000       |
|                           | THD (5 $\mu$ M)  | 1.287       |
|                           | THD (10 $\mu$ M) | 1.620       |
|                           | THD (15 $\mu$ M) | 3.403       |

  

| Down-regulation Protein | Sample           | Fold change |
|-------------------------|------------------|-------------|
| p-mTOR (Ser 2481)       | THD (0 $\mu$ M)  | 1.000       |
|                         | THD (5 $\mu$ M)  | 0.850       |
|                         | THD (10 $\mu$ M) | 0.409       |
|                         | THD (15 $\mu$ M) | 0.576       |
