# Supplementary material for: Thioridazine Enhances P62-Mediated Autophagy and Apoptosis Through Wnt/β-Catenin Signaling Pathway in Glioma Cells
Source: MDPI journal article supplement (doi:10.3390/ijms20030473), 2019-01-22

Fig 4

A

| Thioridazine array (Cmap) |          | Thioridazine array (GBM) |          |
|---------------------------|----------|--------------------------|----------|
| up (A)                    | down (B) | up (C)                   | down (D) |
| ATF3                      | GPRC5B   | DDIT4                    | HAS2     |
| KLF6                      | MCAM     | GDF15                    | EDNRA    |
| SLC7A11                   | LHX2     | PAX8                     | IL11     |
| GDF15                     | CCNE2    | TncRNA                   | RHOB     |
| KLHL24                    | U2SURP   | CCNG2                    | KRTAP2   |
| TRIM2                     | C7orf43  | TncRNA                   | F3       |
| PPP1R15A                  | NPFFR1   | FBXO32                   | PDCD1LG1 |
| INSIG1                    | SRSF7    | KLHL24                   | SMURF2   |
| INSIG1                    | SKP2     | FBXO32                   | GPR17    |
| TNFAIP3                   | FZD1     | KLHL24                   | HBEGF    |
| DDIT4                     | CDC25A   | PAX8                     | CXCL3    |
| WIPI1                     | CCNE2    | DDIT3                    | CD274    |
| KLF6                      | SKP2     | HERPUD1                  | CDC25A   |
| DDIT3                     | DHODH    | KLHL24                   | BCL2A1   |
| CCNG2                     | TSFM     | INHBE                    | IL8      |
| ISG20                     | PPIL2    | LOC153222                | IL6      |
| MAFF                      | RBM8A    | TncRNA                   | DUSP1    |
| INSIG1                    | DTL      | MALAT1                   | MED4     |
| CCNG2                     | PRR15L   | KLHL24                   | IER5     |
| DUSP4                     | THNSL1   | ZNF165                   | CCNE2    |
| ISG20                     | SLC30A5  | CYP2C9                   | ANKRD1   |
| OASL                      | C1QTNF3  | SLC5A3                   | TGFB2    |
| :                         | :        | :                        | :        |

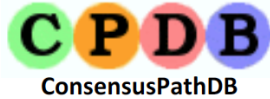

- Pathways in cancer
- GPCR signaling  
(EDNRA, GPRC5B, GPR17, FZD1...)
- Senescence and Autophagy
- DNA damage response
- G1 to S cell cycle control

B

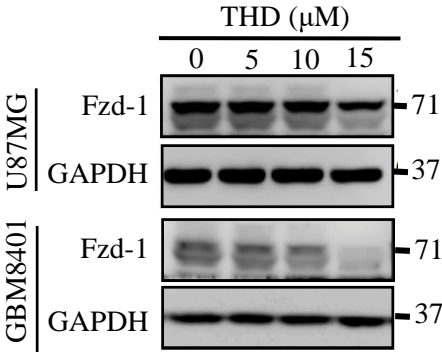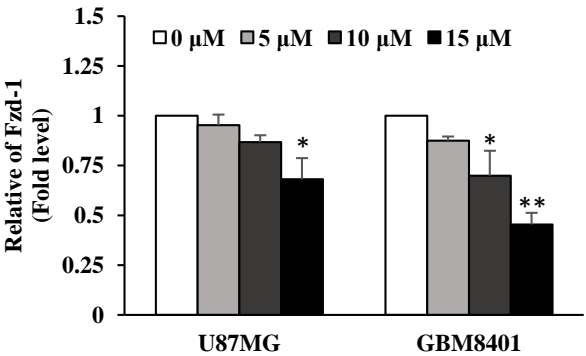

Supplement: s1 [file s1]
