# Supplementary figures and images for: Thioridazine Enhances P62-Mediated Autophagy and Apoptosis Through Wnt/β-Catenin Signaling Pathway in Glioma Cells
Source: MDPI journal article supplement (doi:10.3390/ijms20030473), 2019-01-22

**Fig 2**

**A**

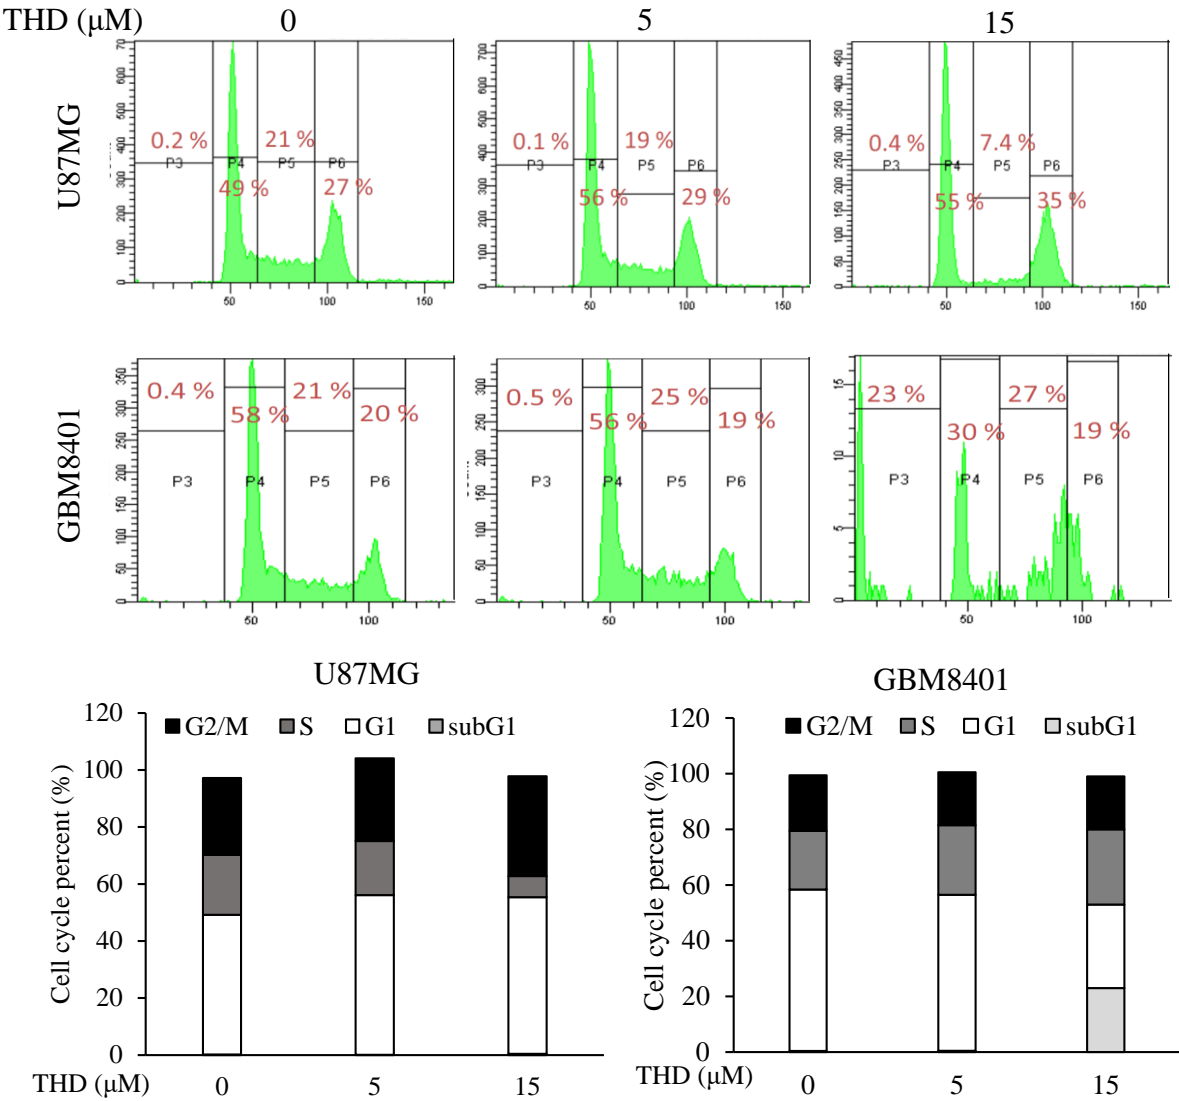

**B**

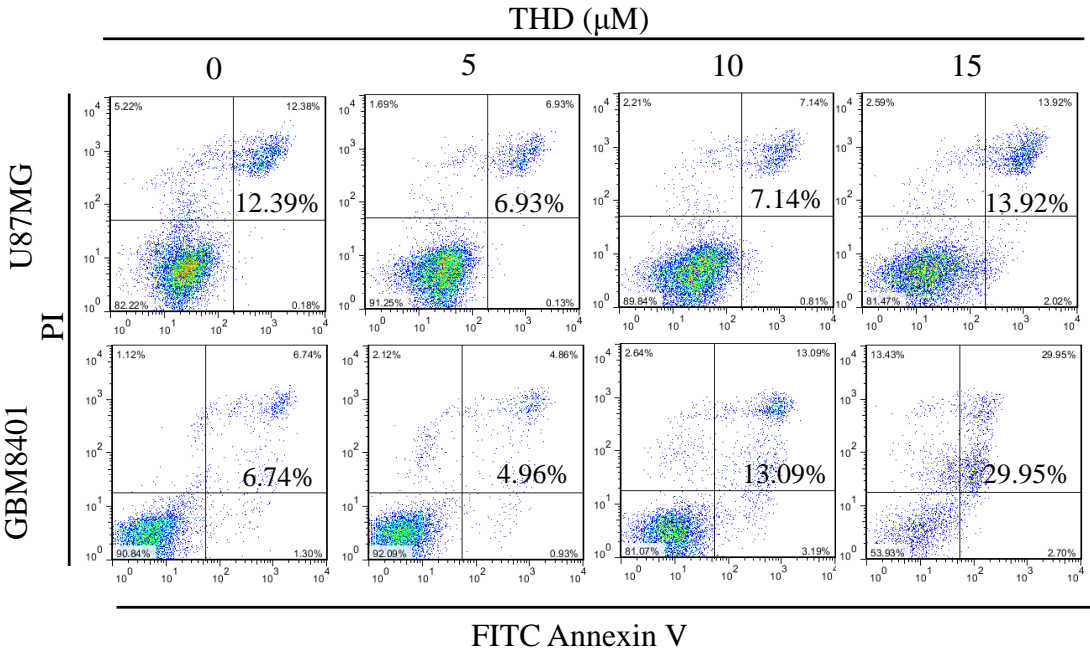

Supplement: s1 [file s1]

# Fig 3

**A**

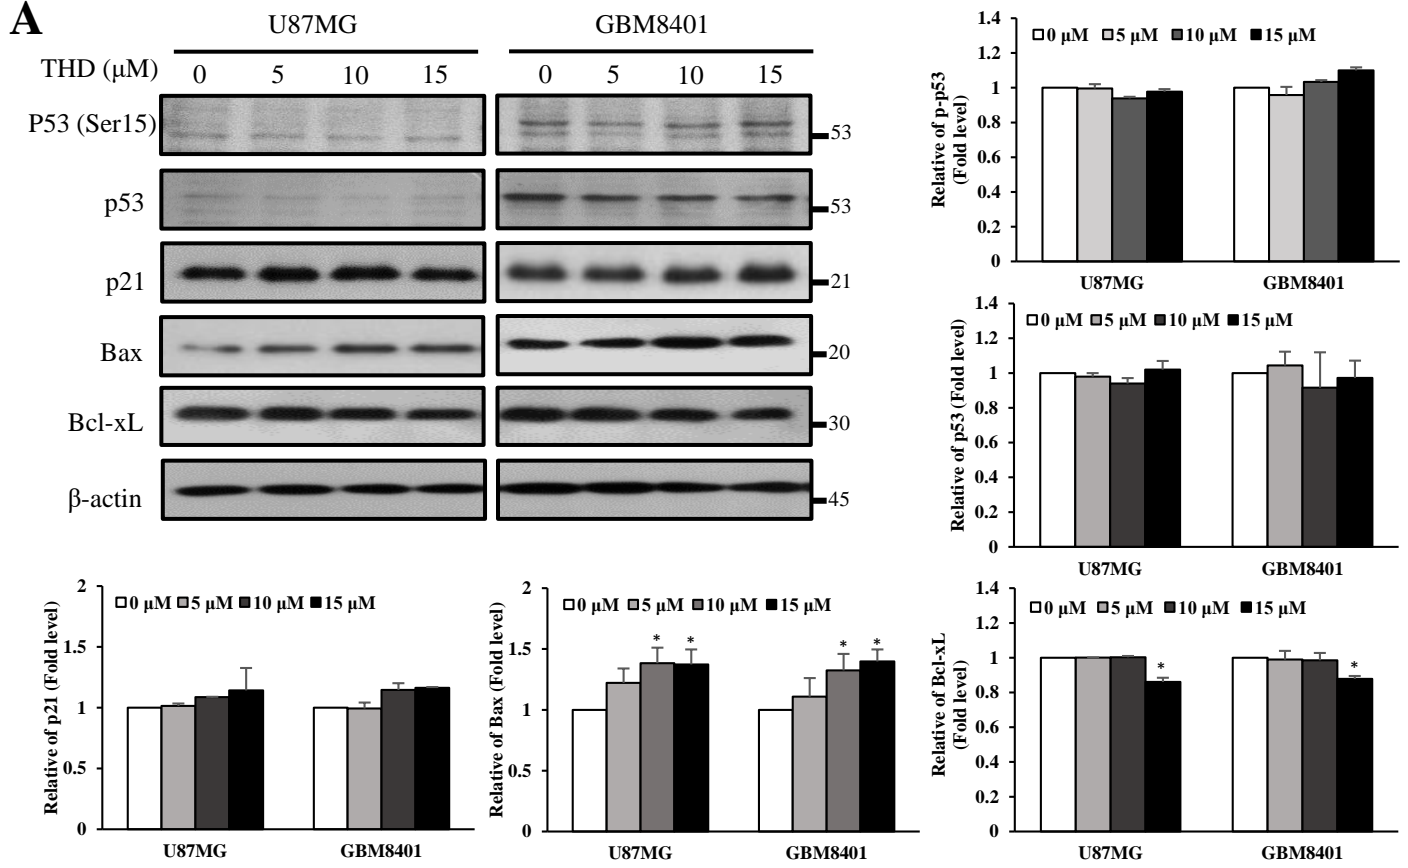

**B**

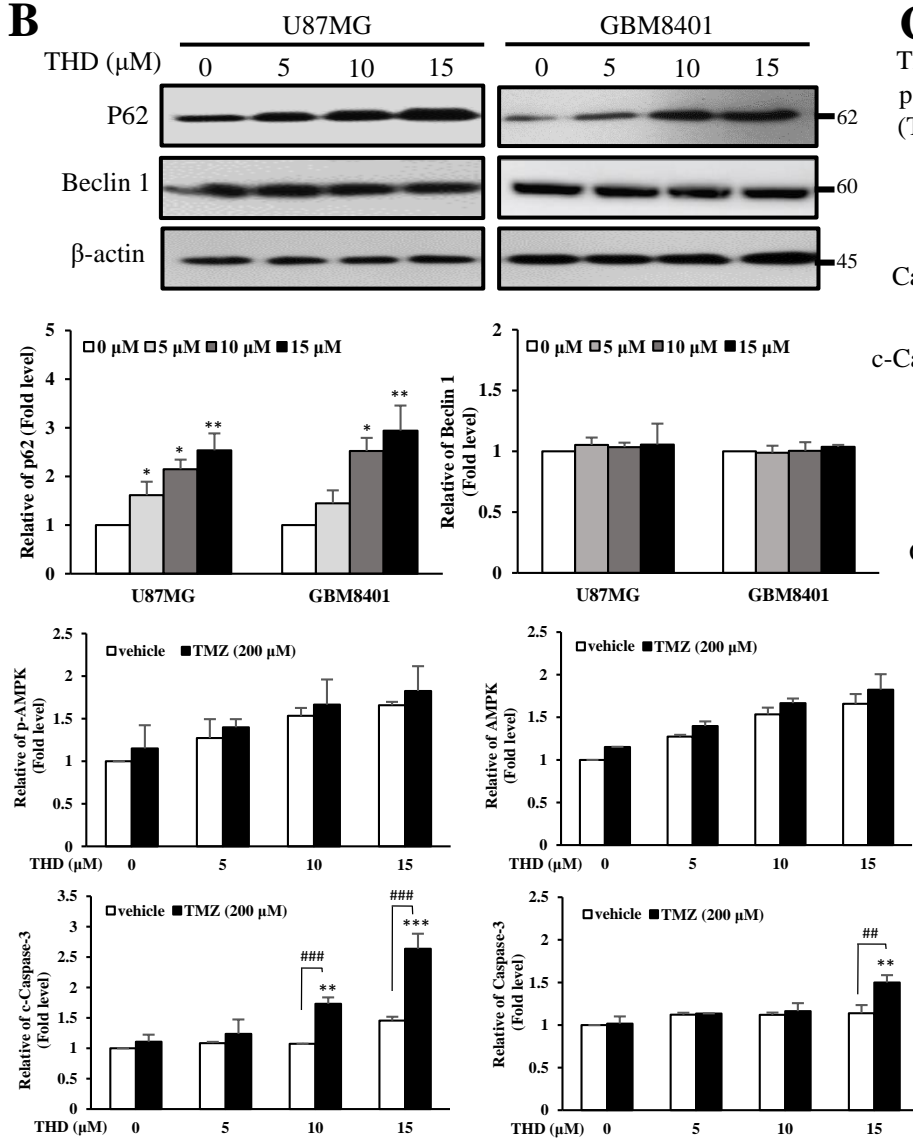

**C**

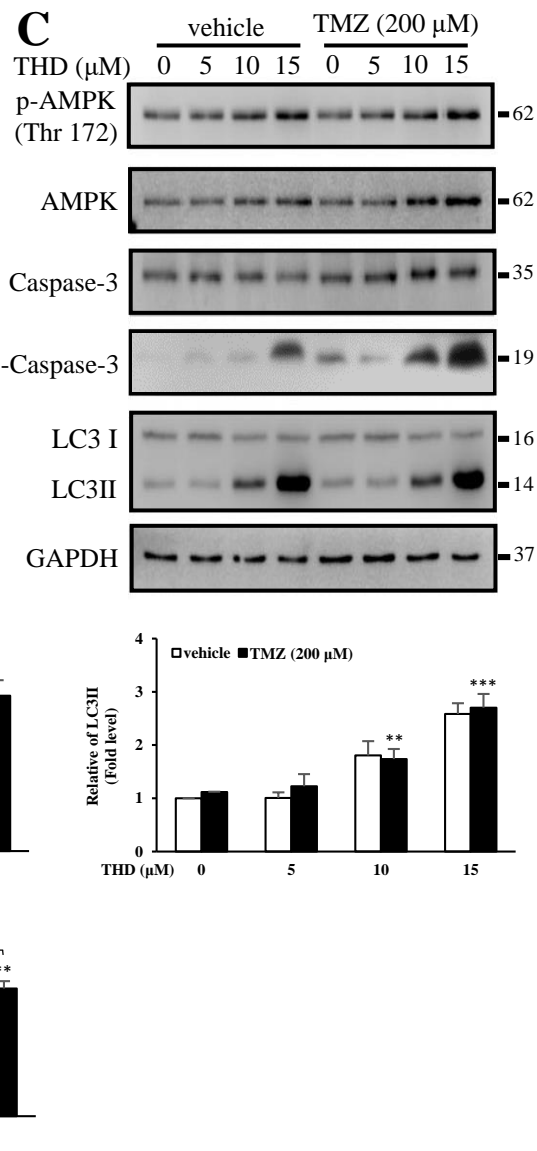

Supplement: s1 [file s1]

**Fig 6**

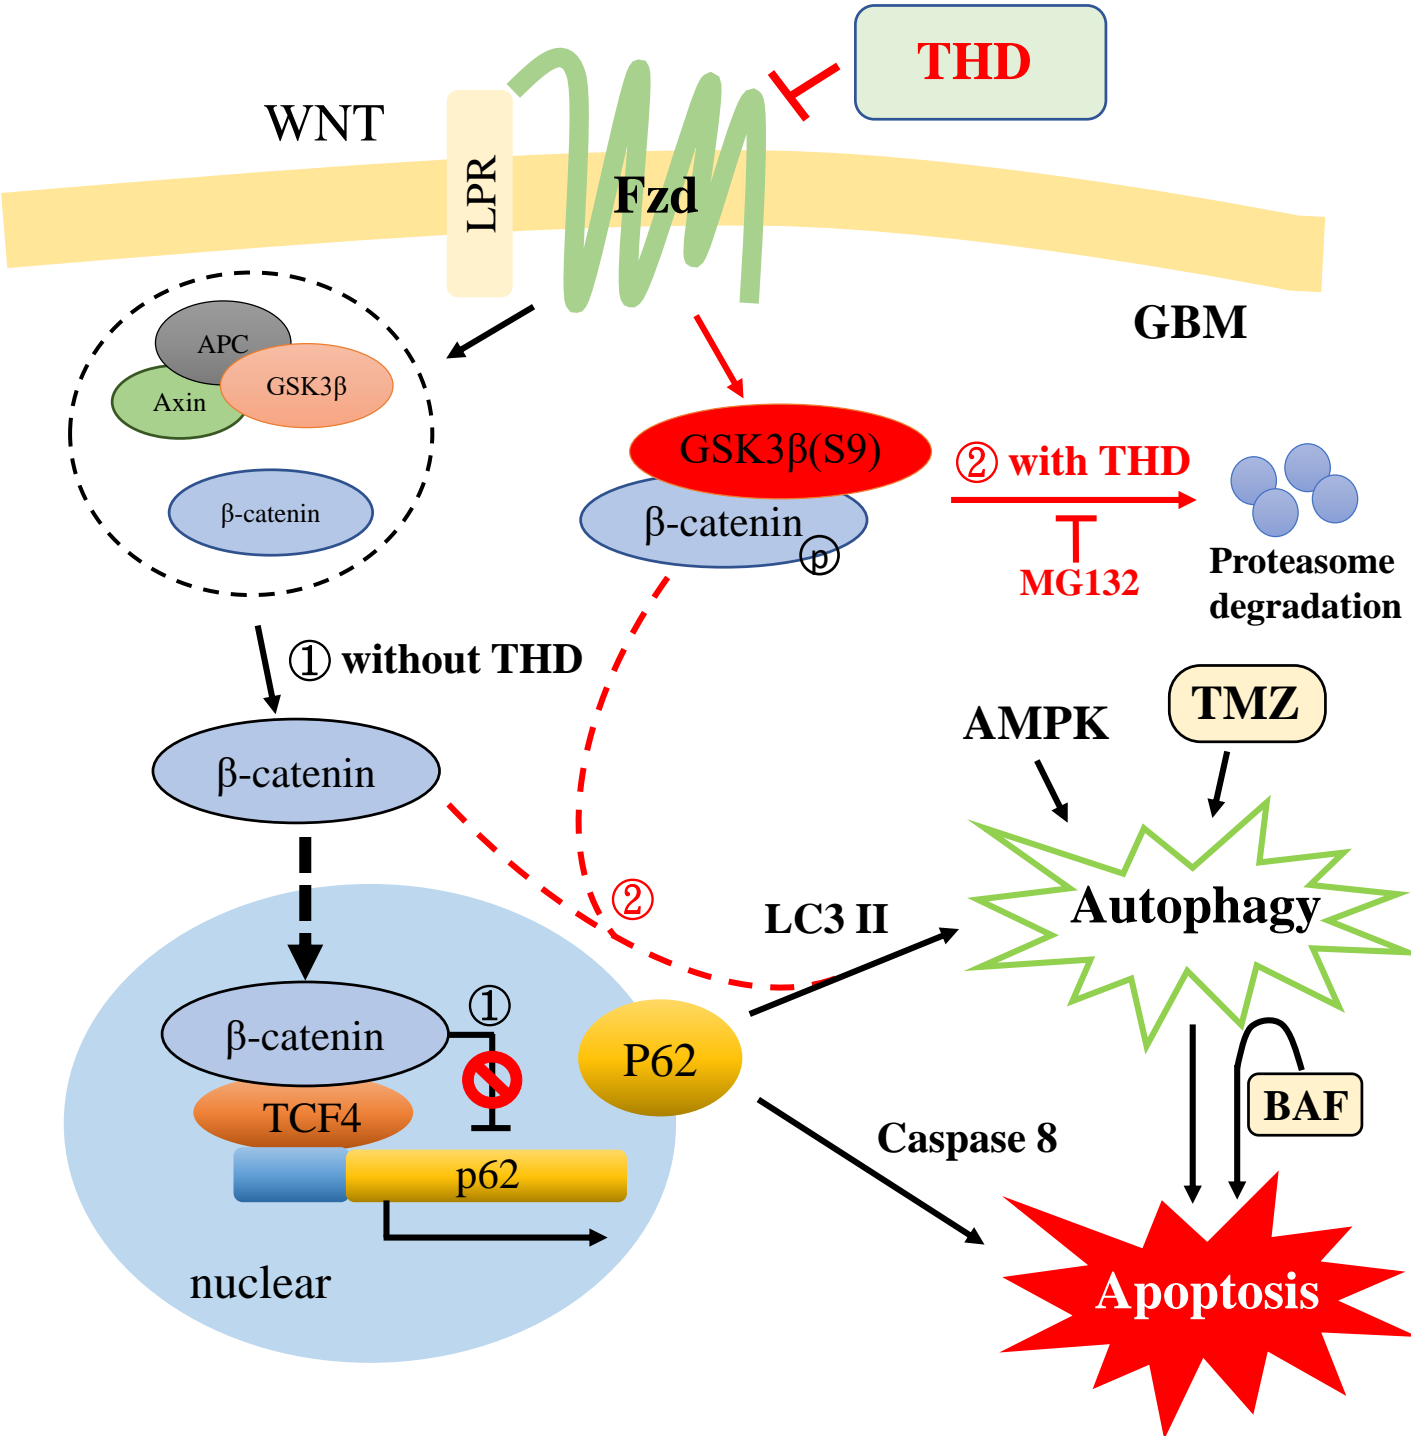

Supplement: s1 [file s1]

**Fig 5**

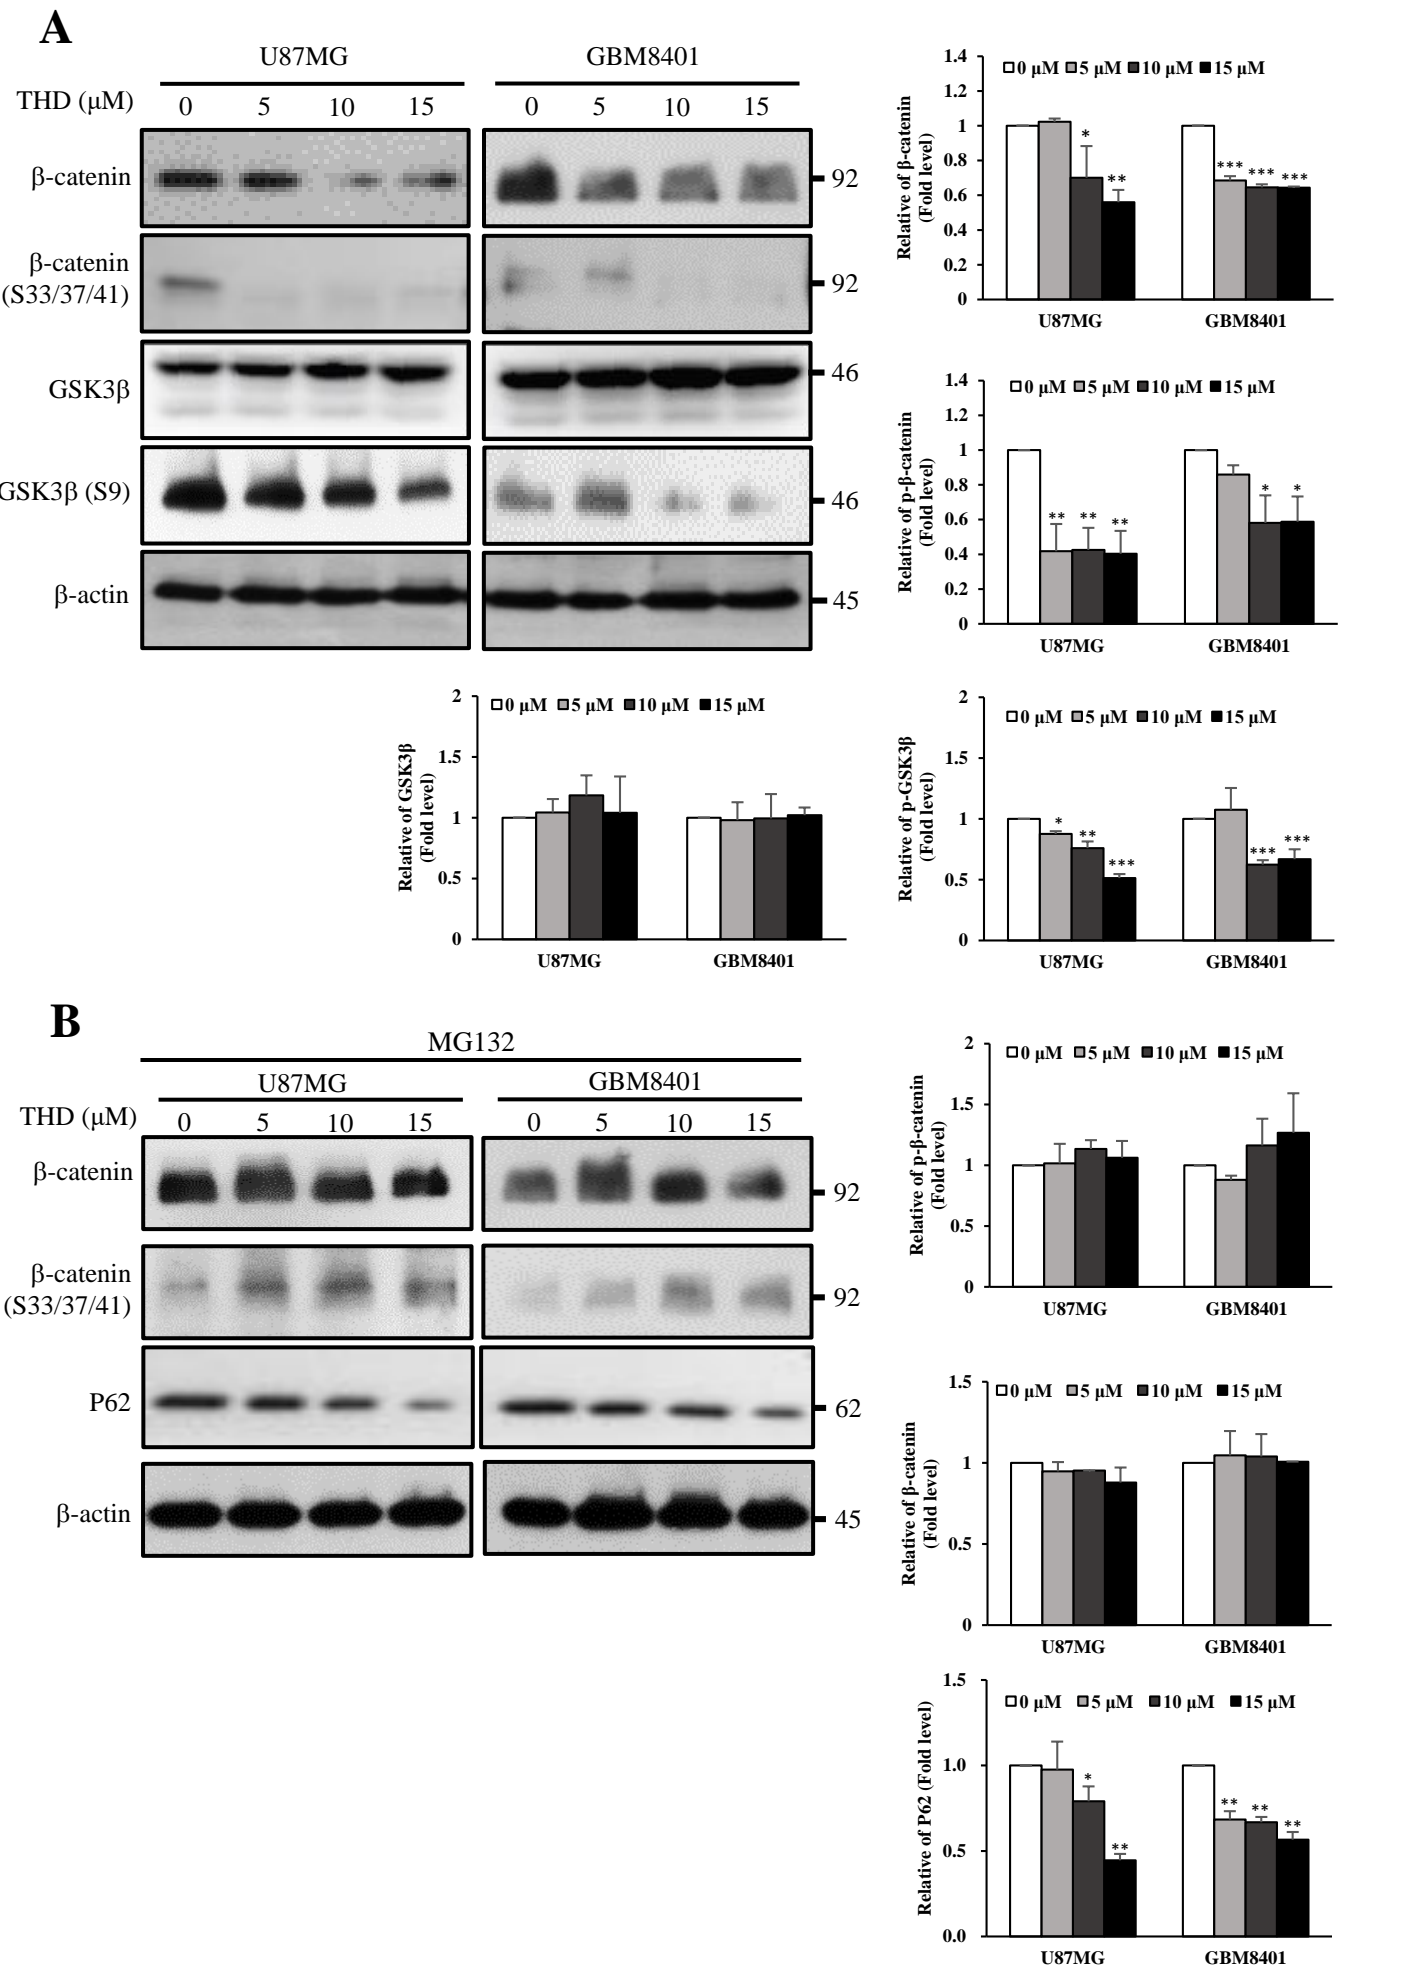

Supplement: s1 [file s1]

**Fig 1**

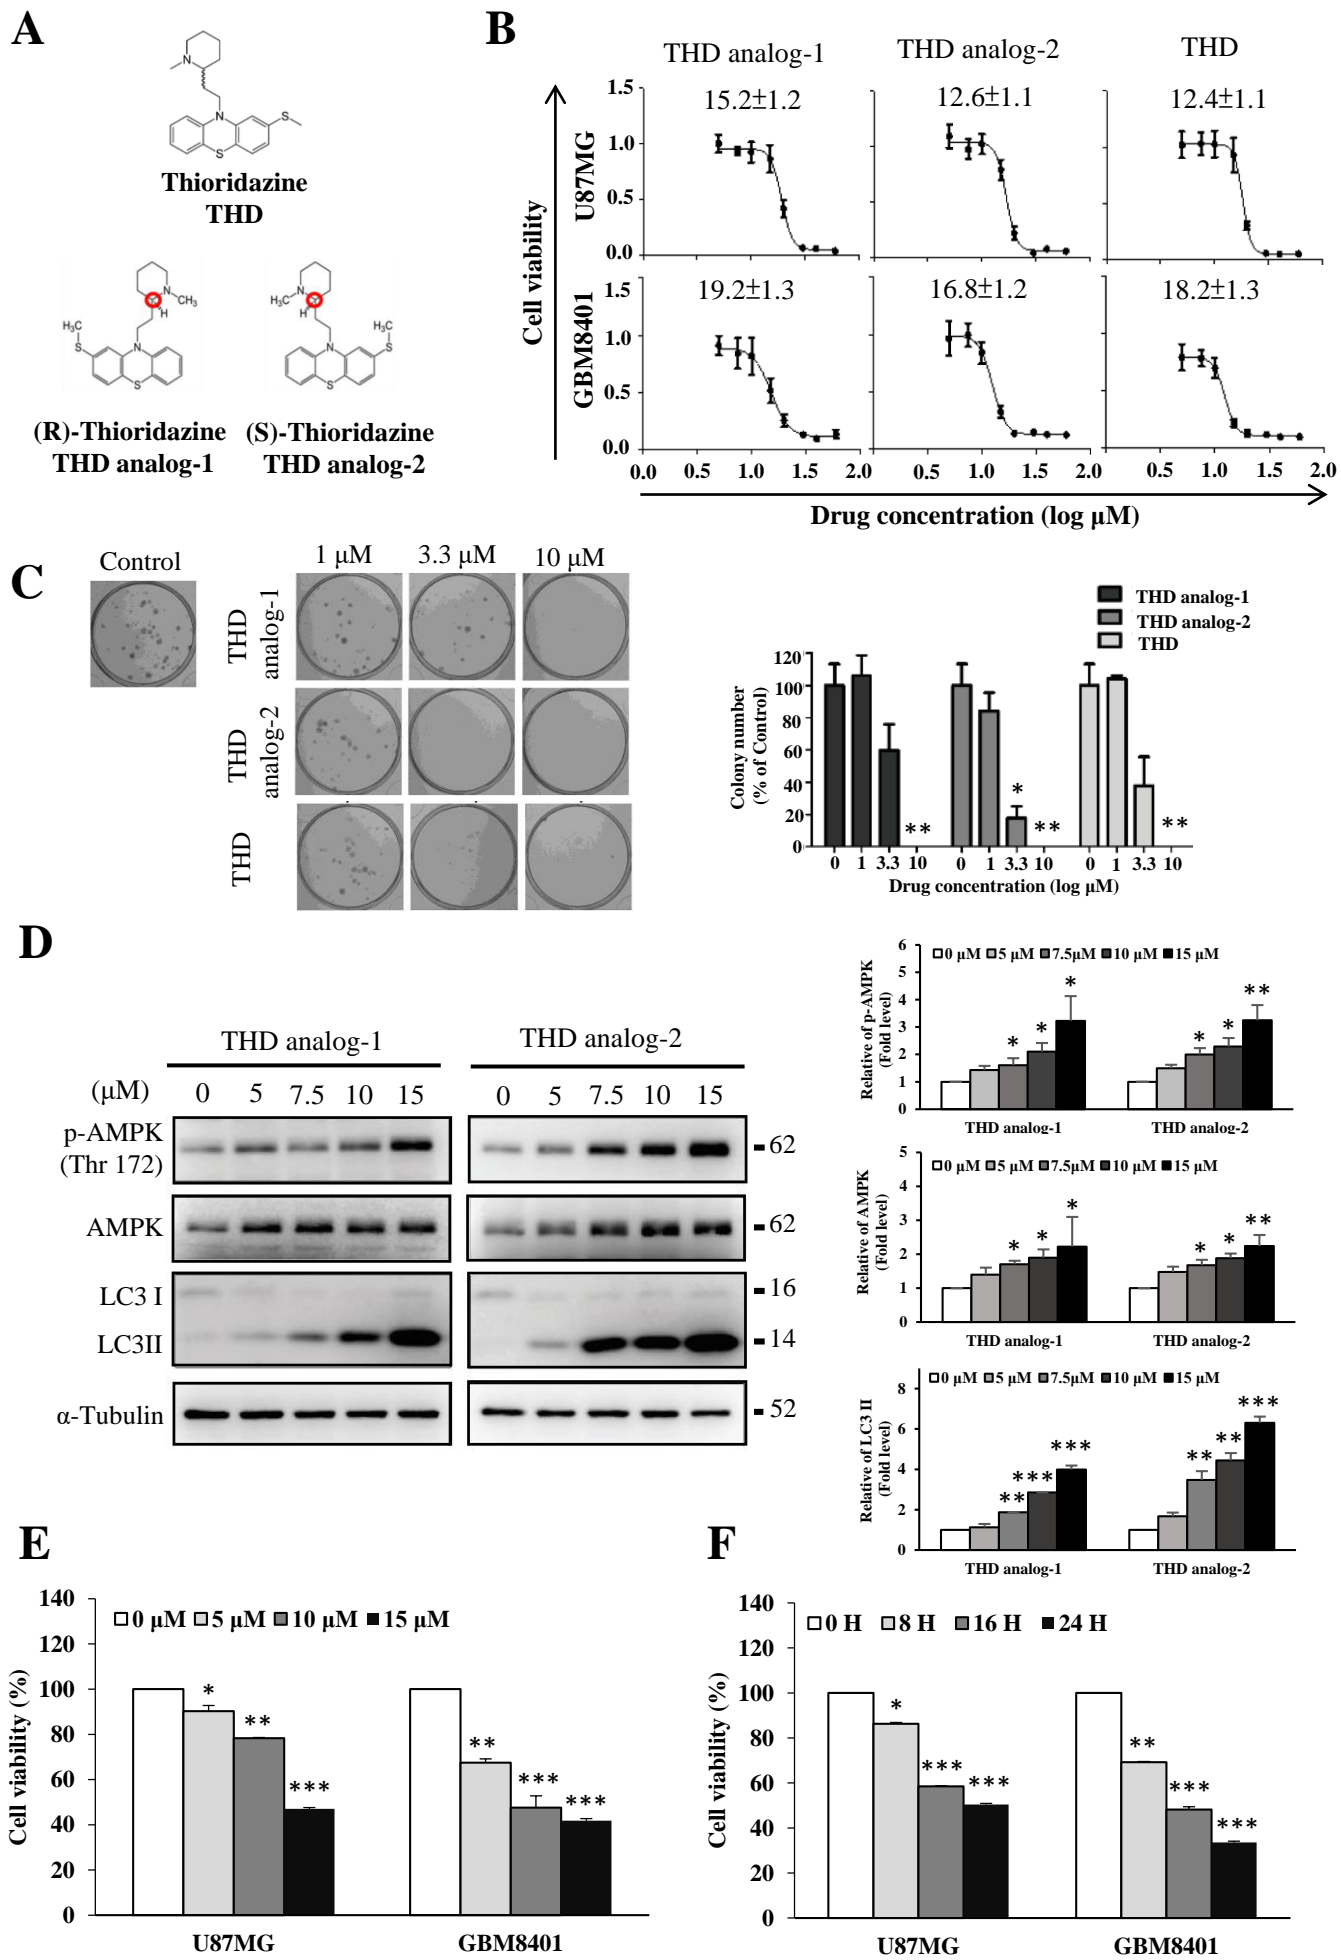

Supplement: s1 [file s1]
